# Supplementary material for: Measurement matters: higher waist-to-hip ratio but not body mass index is associated with deficits in executive functions and episodic memory
Source: PubMed Central journal article supplement (PMC6130234; doi:10.7717/peerj.5624), 2018-09-07
Supplement: peerj-06-5624-s001.pdf [file peerj-06-5624-s001.pdf]

Table A.1. Zero-order Correlations between Covariates and Criterion Variables

|                   | Episodic Memory | Executive Functions |
|-------------------|-----------------|---------------------|
| Age               | .340**          | .105**              |
| Sex               | -.225**         | .105**              |
| Education         | .209**          | .426**              |
| Household Income  | .193**          | .355**              |
| Subjective status | .024            | -.030               |
| Hypertension      | -.142**         | -.203**             |
| Diabetes          | -.121**         | -.145**             |
| Stroke            | -.075**         | -.110**             |
| Self-rated Health | -.180**         | -.301**             |
| Chronic disease   | -.111**         | -.229**             |
| Former smoker     | -.095**         | -.063**             |
| Current smoker    | .024            | -.042*              |
| Alcohol           | .100**          | .204**              |
| Physical exercise | .198**          | .315**              |
| Agreeableness     | .049*           | -.090**             |
| Openness          | .086**          | .114**              |
| Neuroticism       | -.004           | -.041*              |
| Extraversion      | .044*           | -.037*              |
| Conscientiousness | .101**          | .077**              |
| Perceived obesity | -.002           | .025                |

Note. \*  $p < .05$ , \*\*  $p < .001$
