# Supplementary material for: Measurement matters: higher waist-to-hip ratio but not body mass index is associated with deficits in executive functions and episodic memory
Source: PubMed Central journal article supplement (PMC6130234; doi:10.7717/peerj.5624), 2018-09-07
Supplement: peerj-06-5624-s002.pdf [file peerj-06-5624-s002.pdf]

Appendix B: Scatterplot of the relationships between obesity and cognitive functions

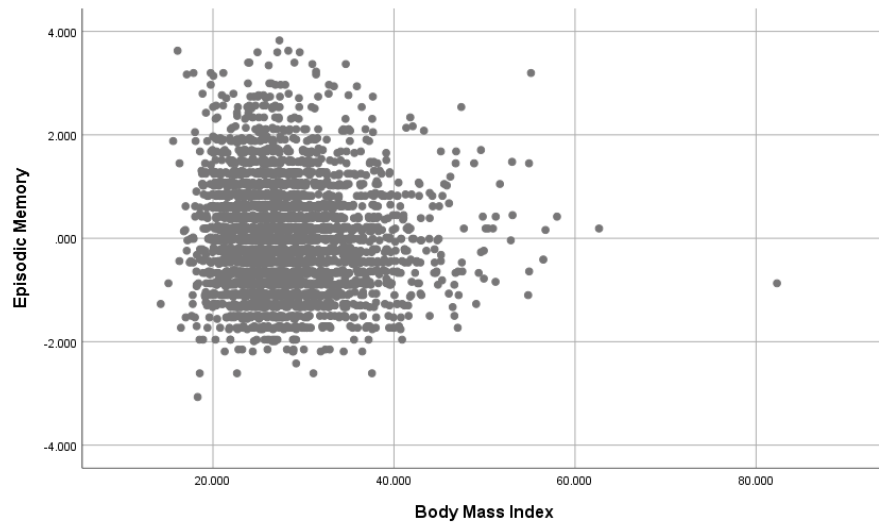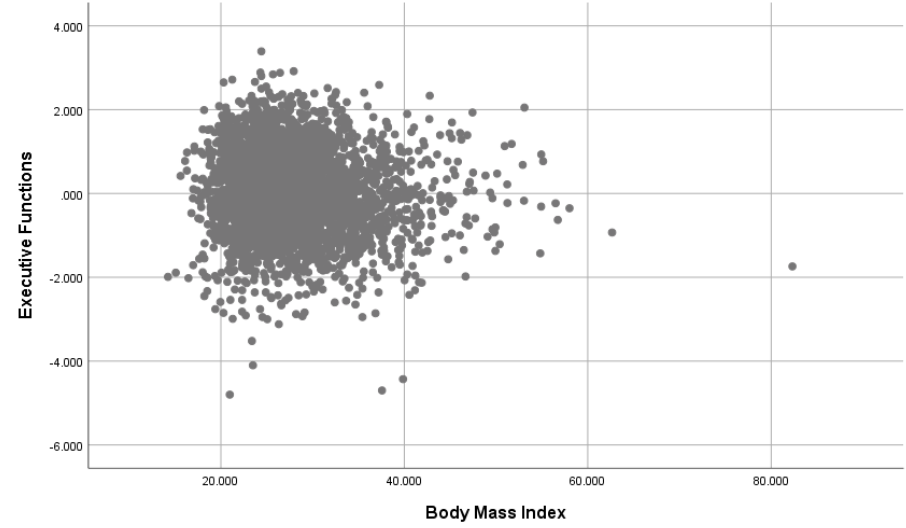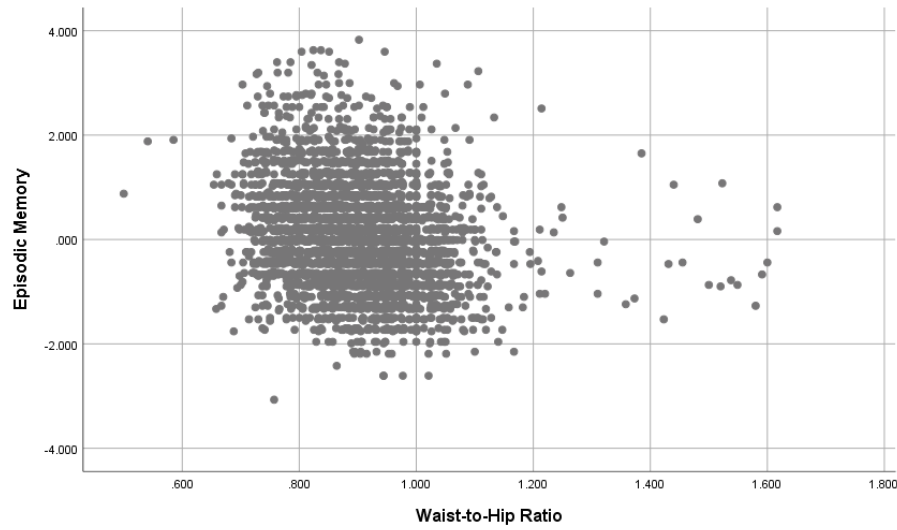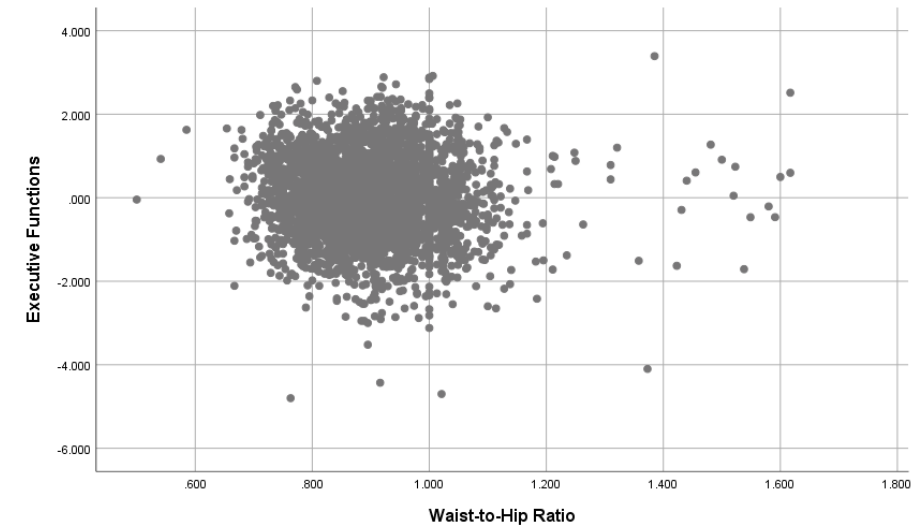

*Figure B.1.* Scatterplot for the unadjusted relationships between obesity and cognitive functions. The figures were presented before missing data imputation and winsorization.
